# Supplementary material for: ADT-OH exhibits anti-metastatic activity on malignant melanoma through inhibition of FAK/Paxillin signaling pathways
Source: Research Square preprint supplement (doi:10.21203/rs.3.rs-100300/v1), 2020-11-05
Supplement: Supplementary file 1 [file 566b56733ac8210db4f3280d.docx]

**Supplementary Table S1:** **The primers of selected genes for real time PCR.**

| Gene | Forward primer (5’-3’) | Reverse primer (5’-3’) |
| --- | --- | --- |
| h-Ecadherin | GACAACAAGCCCGAATTC | GGAAACTCTCTCGGTCCA |
| h-Vimentin | GAGAACTTTGCCGTTGAAGC | GCTTCCTGTAGGTGGCAATC |
| h-FAK | GCTTACCTTGACCCCAACTTG | ACGTTCCATACCAGTACCCAG |
| h-Paxillin | CTGCTGGAACTGAACGCTGTA | GGGGCTGTTAGTCTCTGGGA |
| m-Ecadherin | CAGGTCTCCTCATGGCTTTGC | CTTCCGAAAAGAAGGCTGTCC |
| m-Vimentin | CGTCCACACGCACCTACAG | GGGGGATGAGGAATAGAGGCT |
| m-FAK | GAGTACGTCCCTATGGTGAAGG | CTCGATCTCTCGATGAGTGCT |
| m-Paxillin | CAAACGGCCAGTGTTCTTGTC | TGTGTGGTTTCCAGTTGGGTA |
| β-actin | GAGACCTTCAACACCCCAGC | ATGTCACGCACGATTT CCC |
